# Supplementary material for: Template-directed synthesis of sulphur doped NiCoFe layered double hydroxide porous nanosheets with enhanced electrocatalytic activity for the oxygen evolution reaction
Source: Royal Society of Chemistry journal article supplement (doi:10.1039/c7ta09734d), 2018-01-01
Supplement: c7ta09734d1.pdf [file c7ta09734d1.pdf]

Electronic Supplementary Information

**Template-directed synthesis of sulphur doped NiCoFe layered double hydroxide porous nanosheets with enhanced electrocatalytic activity for oxygen evolution reaction**

*Li-Ming Cao,<sup>a</sup> Jia-Wei Wang,<sup>a</sup> Di-Chang Zhong,<sup>\*b</sup> and Tong-Bu Lu<sup>\*a,b</sup>*

<sup>a</sup>MOE Key Laboratory of Bioinorganic and Synthetic Chemistry, School of Chemistry and Chemical Engineering, Sun Yat-Sen University, Guangzhou 510275, China

<sup>b</sup>Institute of New Energy Materials & Low Carbon Technology, School of Material Science & Engineering, Tianjin University of Technology, Tianjin 300384, China

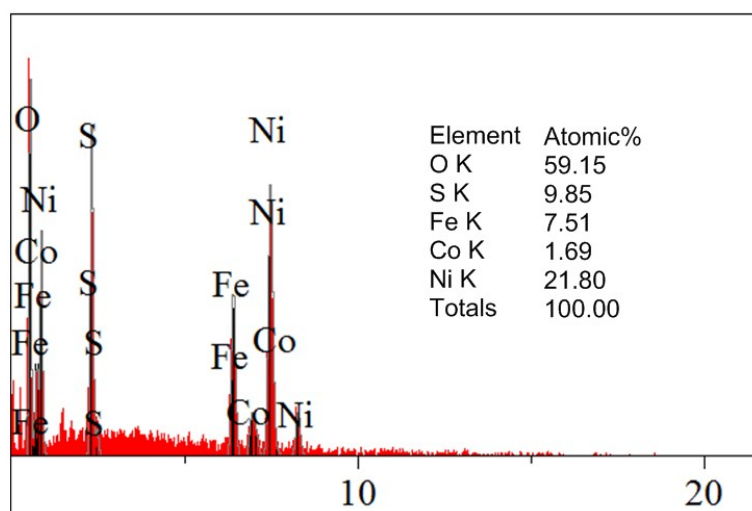

**Fig. S1** EDX analyses for S-NiCoFe LDH.

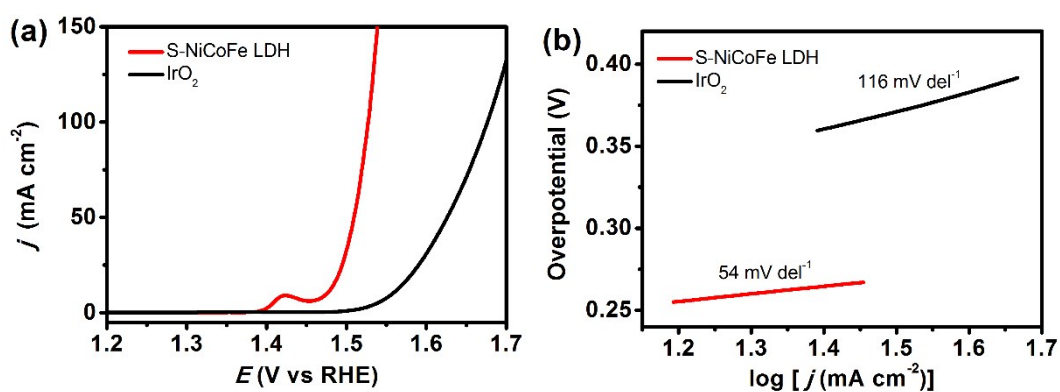

**Fig. S2** (a) LSV curves and (b) Tafel plots of S-NiCoFe LDH powder/CC, and IrO<sub>2</sub>/CC, recorded at a scan rate of 1 mV s<sup>-1</sup> in 1.0 M KOH.

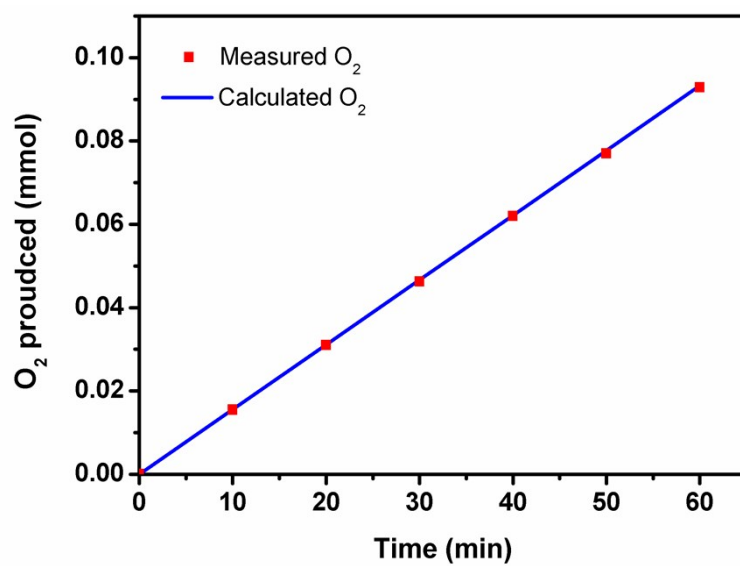

**Fig. S3** The measured and theoretical yields of O<sub>2</sub> over time during electrolysis of S-NiCoFe LDH at the current density of 10 mA cm<sup>-2</sup>.

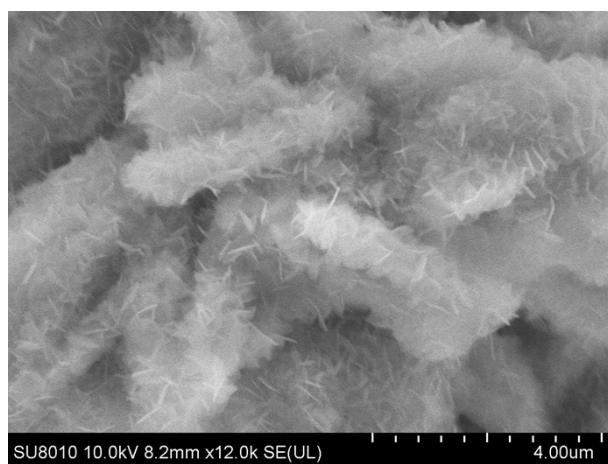

**Fig. S4** SEM image of S-NiCoFe LDH after OER.

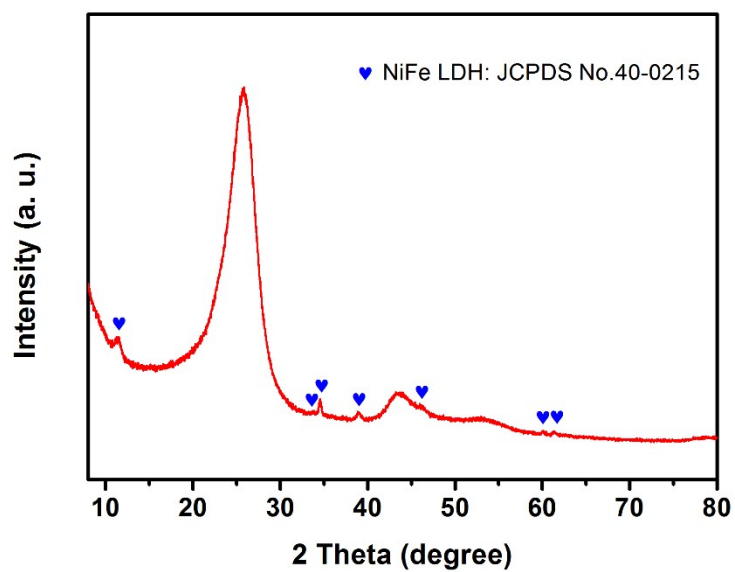

**Fig. S5** XRD patterns of S-NiCoFe LDH after OER.

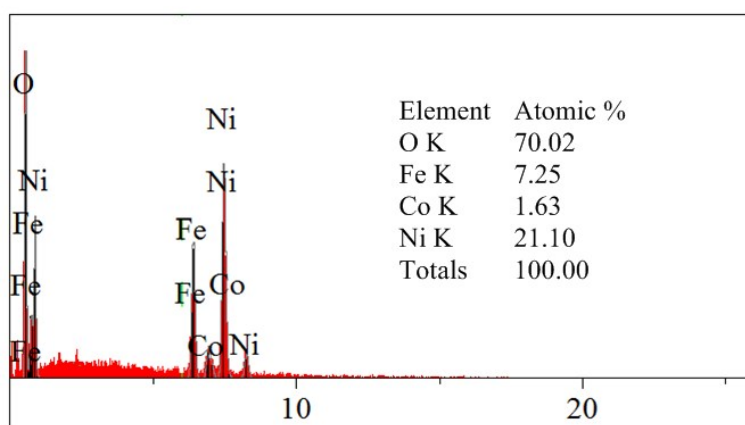

**Fig. S6** EDX analyses for S-NiCoFe LDH after OER.

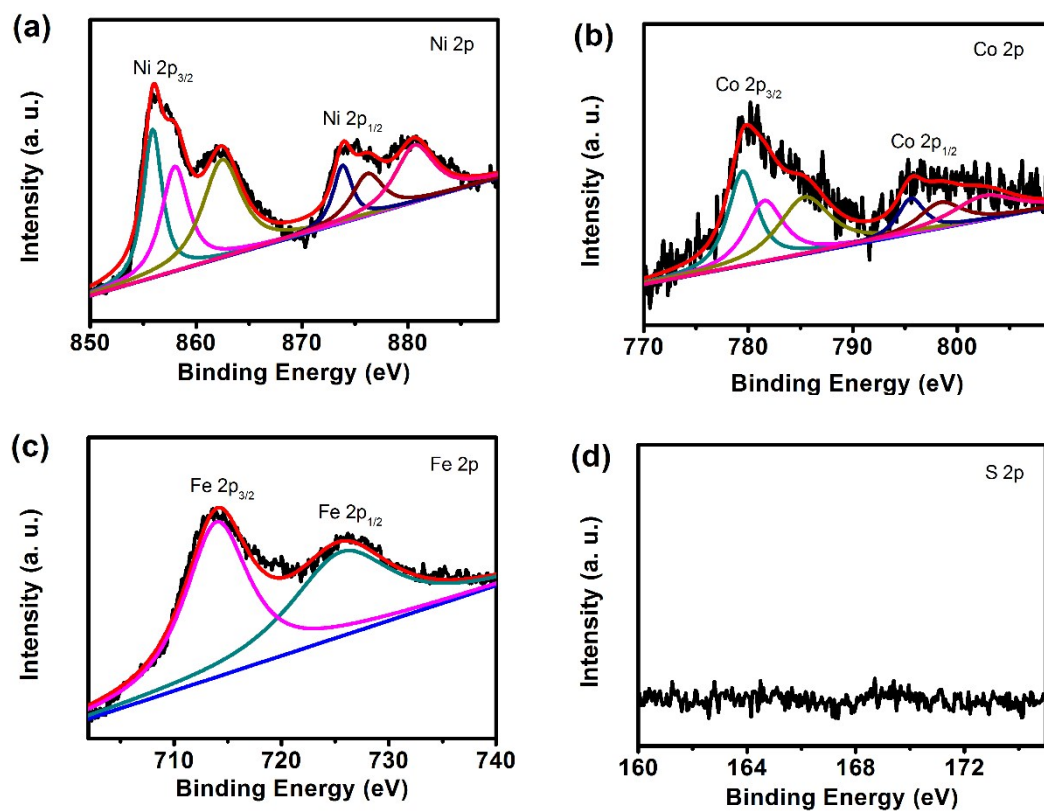

**Fig. S7** High resolution XPS spectra of (a) Ni 2p, (b) Co 2p, (c) Fe 2p, and (d) S 2p for S-NiCoFe LDH after OER.

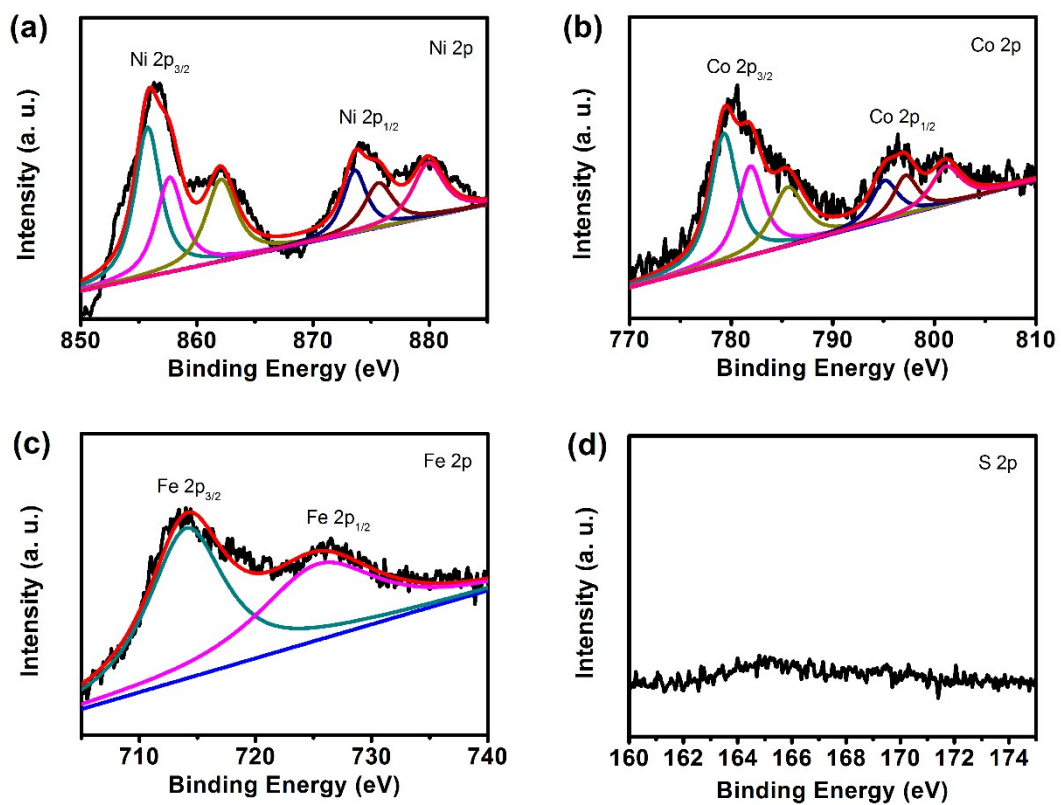

**Fig. S8** High resolution XPS spectra of (a) Ni 2p, (b) Co 2p, (c) Fe 2p, and (d) S 2p for S-NiCoFe LDH after 500 CV cycles.

**Table S1.** OER activity of some reported electrocatalysts.<sup>a</sup>

| Catalyst                                             | $\eta$ at 10 mA cm <sup>-2</sup> (mV) | $\eta$ at 100 mA cm <sup>-2</sup> (mV) | Tafel slope (mV dec <sup>-1</sup> ) | Mass loading (mg cm <sup>-2</sup> ) | TOF <sub>300</sub> (s <sup>-1</sup> ) <sup>b</sup> | Substrate <sup>c</sup> | Reference |
|------------------------------------------------------|---------------------------------------|----------------------------------------|-------------------------------------|-------------------------------------|----------------------------------------------------|------------------------|-----------|
| S-NiCoFe LDH                                         | 206                                   | 258                                    | 46                                  | 1.05                                | 0.102                                              | CC                     | This work |
| NiFeSe                                               | N.A.                                  | 270                                    | 47.2                                | 1.5                                 | N.A.                                               | NF                     | 1         |
| NiFeO <sub>x</sub>                                   | 230                                   | 260                                    | 31.5                                | 1.6                                 | N.A.                                               | CFP                    | 2         |
| Fe(PO <sub>3</sub> ) <sub>2</sub> /Ni <sub>2</sub> P | 177                                   | 221                                    | 51.9                                | 8.0                                 | 0.12                                               | NF                     | 3         |
| Fe-doped Ni <sub>3</sub> S <sub>2</sub>              | N.A.                                  | 253                                    | 65.5                                | 12.7                                | N.A.                                               | NF                     | 4         |
| Gelled FeCoW                                         | 190                                   | 250                                    | N.A.                                | 0.21                                | 0.46                                               | Au@NF                  | 5         |
| MoS <sub>2</sub> /Ni <sub>3</sub> S <sub>2</sub>     | 218                                   | 290                                    | 88                                  | 9.7                                 | N.A.                                               | NF                     | 6         |
| CoFe <sub>2</sub> O <sub>4</sub> /C NRAs             | 240                                   | 290                                    | 45                                  | 0.424                               | N.A.                                               | NF                     | 7         |
| Co-Fe-P                                              | 244                                   | N.A.                                   | 58                                  | 1.03                                | 0.0915                                             | NF                     | 8         |
| NiCoP                                                | 242                                   | 330                                    | 64.2                                | 2.0                                 | N.A.                                               | CC                     | 9         |
| Ni <sub>1.5</sub> Fe <sub>0.5</sub> P                | 264                                   | 293                                    | 55                                  | 1.38                                | N.A.                                               | CFP                    | 10        |

(a) The electrolyte is 1.0 M KOH unless otherwise stated.  $\eta$  is overpotential. (b) TOF<sub>300</sub> for the turnover frequencies at overpotential = 300 mV. (c) NF = nickel foam; CFP = carbon fiber paper; CC = carbon cloth.

## References

- 1 Z. Wang, J. Li, X. Tian, X. Wang, Y. Yu, K. A. Owusu, L. He and L. Mai, *ACS Appl. Mater. Interfaces*, 2016, **8**, 19386-19392.
- 2 H. Wang, H. W. Lee, Y. Deng, Z. Lu, P. C. Hsu, Y. Liu, D. Lin and Y. Cui, *Nat. Commun.*, 2015, **6**, 7261.
- 3 H. Zhou, F. Yu, J. Sun, R. He, S. Chen, C. W. Chu and Z. Ren, *Proc. Natl. Acad. Sci. U. S. A.*, 2017, **114**, 5607-5611.
- 4 N. Cheng, Q. Liu, A. M. Asiri, W. Xing and X. Sun, *J. Mater. Chem. A*, 2015, **3**, 23207-23212.
- 5 B. Zhang, X. Zheng, O. Voznyy, R. Comin,; M. Bajdich, M. Garcia-Melchor, L. Han, J. Xu, M. Liu, L. Zheng, F. P. Garcia de Arquer, C. T. Dinh, F. Fan, M. Yuan, E. Yassitepe, N. Chen, T. Regier, P. Liu, Y. Li, P. De Luna, A. Janmohamed, H. L. Xin, H. Yang, A. Vojvodic and E. H. Sargent, *Science*, 2016, **352**, 333-337.

- 6 J. Zhang, T. Wang, D. Pohl, B. Rellinghaus, R. Dong, S. Liu, X. Zhuang and X. Feng, *Angew. Chem. Int. Ed.*, 2016, **55**, 6702-6707.
- 7 X. F. Lu, L. F. Gu, J. W. Wang, J. X. Wu, P. Q. Liao and G. R. Li, *Adv. Mater.*, 2017, **29**, 1604437.
- 8 T. Zhang, J. Du, P. Xi and C. Xu, *ACS Appl. Mater. Interfaces*, 2017, **9**, 362-370.
- 9 C. Du, L. Yang, F. Yang, G. Cheng and W. Luo, *ACS Catal.*, 2017, **7**, 4131-4137.
- 10 H. Huang, C. Yu, C. Zhao, X. Han, J. Yang, Z. Liu, S. Li, M. Zhang and J. Qiu, *Nano Energy*, 2017, **34**, 472-480.
